# Supplementary material for: Prioritization of the Target Population for Coronavirus Disease 2019 (COVID-19) Vaccination Program in Thailand
Source: MDPI journal article supplement (doi:10.3390/ijerph182010803), 2021-10-14
Supplement: s1 [file s1]

## Note

1. We estimated “perception of new daily cases ( $y$ )” by assuming  $y$  is a function of “actual new daily cases ( $x$ )”. We denoted:  $\frac{dy}{dt} = (x-y)/14$  as long as  $x > y$ ; and  $\frac{dy}{dt} = (y-x)/14$  as long as  $y \geq x$ .
2. We calculated “percentage change of new daily cases ( $z$ )” by assuming:  $z = (x/y) - 1$
3. We assumed  $z$  is a function of “percentage change in contact frequency given no vaccination ( $j$ )” as appears in the graph.

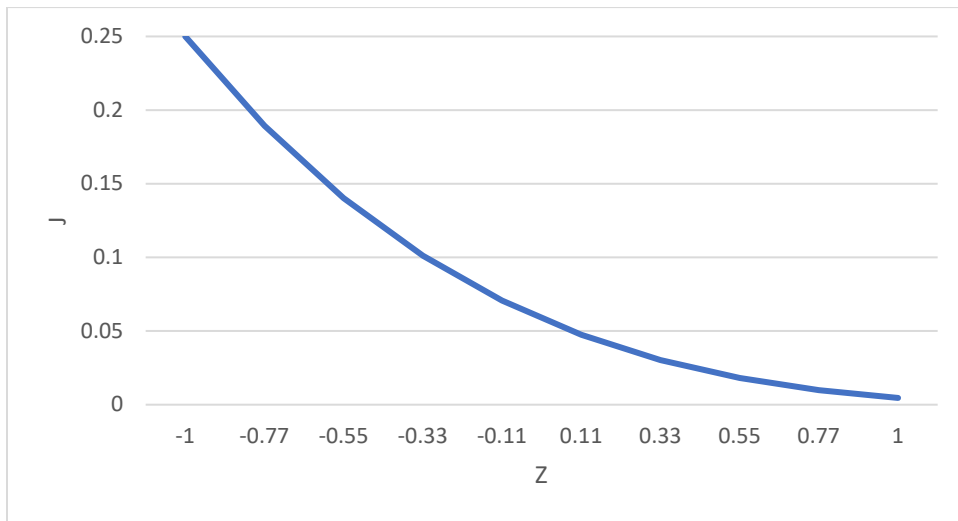

4. We assumed that for the vaccinated people, the “percentage change in contact frequency given vaccination ( $k$ )” is double the size of  $j$ .
5. We multiplied  $(1+j)$  with reproduction number of the non-vaccinated group and  $(1+k)$  for the vaccinated group.
